# Supplementary material
Source: Springer Nature journal article supplement (https://www.springermedizin.de/resource/supplementary/12916_2008_160_MOESM9_ESM.pdf/9599294)

**A**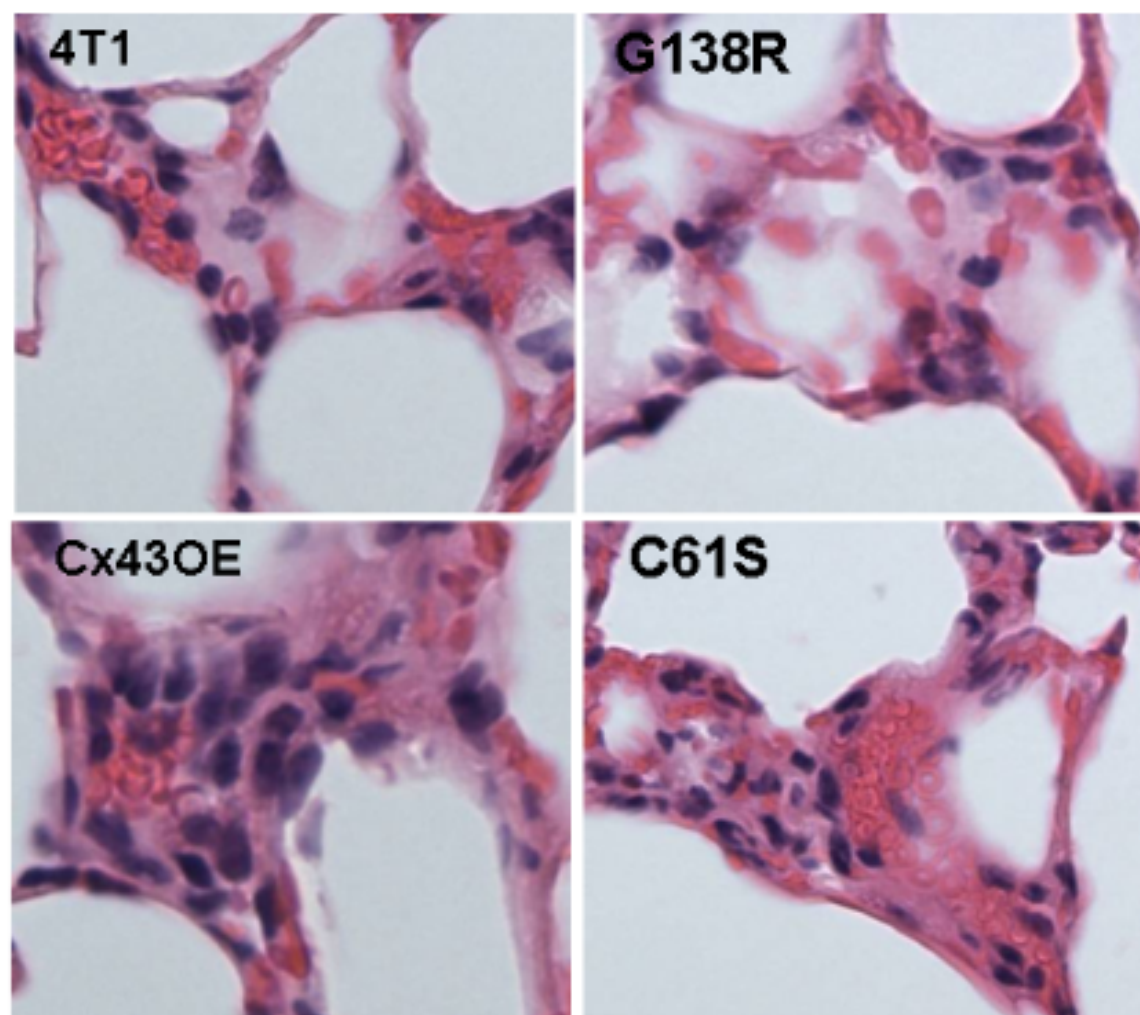**B**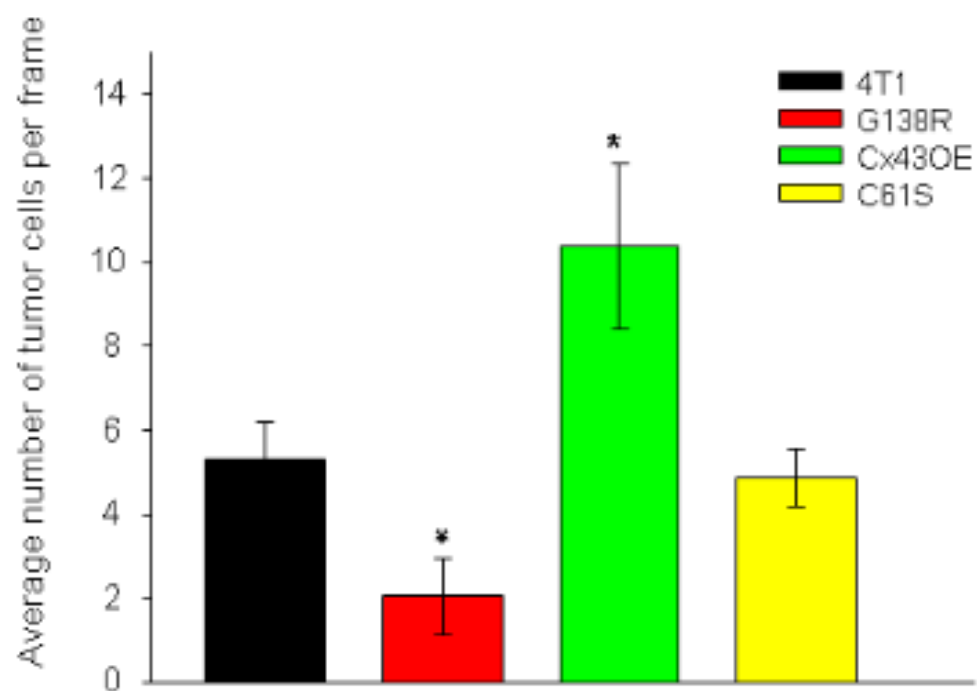

Supplement: MOESM9 [file 9599294]
